# Supplementary material for: Anticlockwise metamorphic pressure–temperature paths and nappe stacking in the Reisa Nappe Complex in the Scandinavian Caledonides, northern Norway: evidence for weakening of lower continental crust before and during continental collision
Source: Copernicus journal article supplement (doi:10.5194/se-10-117-2019), 2019-01-17
Supplement: Supplementary file 1 [file se-10-117-2019-supplement.zip]

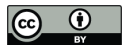

## *Supplement of*

# **Anticlockwise metamorphic pressure–temperature paths and nappe stacking in the Reisa Nappe Complex in the Scandinavian Caledonides, northern Norway: evidence for weakening of lower continental crust before and during continental collision**

Carly Faber et al.

*Correspondence to:* Carly Faber ([carlyfaber1@gmail.com](mailto:carlyfaber1@gmail.com))

- [se-10-117-2019-supplement-title-page.pdf](#)
- Supplementary material
  - [Figures S1-S4 \(garnet maps and full isopleths\).docx](#)
  - [S1 Appendix - analytical methods.docx](#)
  - [S1-S3 Supplementary tables \(XRF, SIMS, TIMS\).xls](#)
  - [S4-S7 Minerals supplementary tables \(mineral probe analyses\).xls](#)

The copyright of individual parts of the supplement might differ from the CC BY 4.0 License.
